# Supplementary material for: ZnO nanoparticle confined stress amplified all-fiber piezoelectric nanogenerator for self-powered healthcare monitoring
Source: Royal Society of Chemistry journal article supplement (doi:10.1039/d1se00444a), 2021-01-01
Supplement: d1se00444a1.pdf [file d1se00444a1.pdf]

## Electronic Supplementary Information (ESI)

### **ZnO Nanoparticle Confined Stress Amplified All-Fiber Piezoelectric Nanogenerator for Self-powered Healthcare Monitoring**

Biswajit Mahanty<sup>a,b,⊥</sup>, Sujoy Kumar Ghosh<sup>a,†,⊥</sup>, Santanu Jana<sup>c,⊥</sup>, Zinnia Mallick<sup>d</sup>, Subrata Sarkar<sup>a</sup>, Dipankar Mandal<sup>d\*</sup>

<sup>a</sup>Department of Physics, Jadavpur University, Kolkata 700032, India

<sup>b</sup>Department of Electronics & Communication Engineering, Ramgarh Engineering College, Murbanda, Ramgarh, Jharkhand 825101, India

<sup>c</sup>Department of Electronics, Netaji Nagar Day College, Kolkata 700092, India

<sup>d</sup>Institute of Nano Science and Technology, Knowledge City, Sector 81, Mohali 140306, India

*Corresponding author: dmandal@inst.ac.in, dpkrmandal@gmail.com*

<sup>⊥</sup> These authors contributed equally to this work.

<sup>†</sup>Present Address:

NEST, Istituto Nanoscienze-CNR, Piazza San Silvestro 12, I-56127 Pisa, Italy

**Text S1:**

In the finite element method, we solved the following linear mechanical equation S11 that links the stress  $T$  to the applied force  $F$  on the BPNG and the Poisson equation S12 that links the electric displacement  $D$  to the fixed charge density  $\rho_V$ ,

$$\nabla \cdot T = F, \quad (\text{S11})$$

$$\nabla \cdot D = \rho_V, \quad (\text{S12})$$

The coupling between the structural and electrical domains can be expressed in the form of a connection between the material stress and its permittivity at constant stress or as a coupling between the material strain and its permittivity at constant strain. The equations (S11, S12) are coupled to the piezoelectric equations of strain-charge form (S13, S14) and stress-charge form (S15, S16) that correlate the stress  $T$  tensor, strain  $S$ , electric displacement  $D$  and the electric field  $E$  using the permittivity  $\varepsilon$ , elasticity tensor  $c$  and piezoelectric coupling tensor  $e$  and  $d$ .

**Strain-Charge form:**

The strain-charge form of a piezoelectric material is written as,

$$S = s_E \cdot T + d^T \cdot E, \quad (\text{S13})$$

$$D = d \cdot T + \varepsilon_0 \cdot \varepsilon_{rT} E, \quad (\text{S14})$$

The material parameters  $s_E$ ,  $d$ , and  $\varepsilon_{rT}$  correspond to the material compliance, coupling properties, and relative permittivity at constant stress.  $\varepsilon_0$  is the permittivity of free space.

**Stress-Charge form:**

The stress-charge form of the piezoelectric material is written as,

$$T = c_E.S + e^T.E, \quad (\text{S15})$$

$$D = e.S + \varepsilon_0.\varepsilon_{rS}.E, \quad (\text{S16})$$

The material parameters  $c_E$ ,  $e$ , and  $\varepsilon_{rS}$  correspond to the material stiffness, coupling properties, and relative permittivity at constant strain.

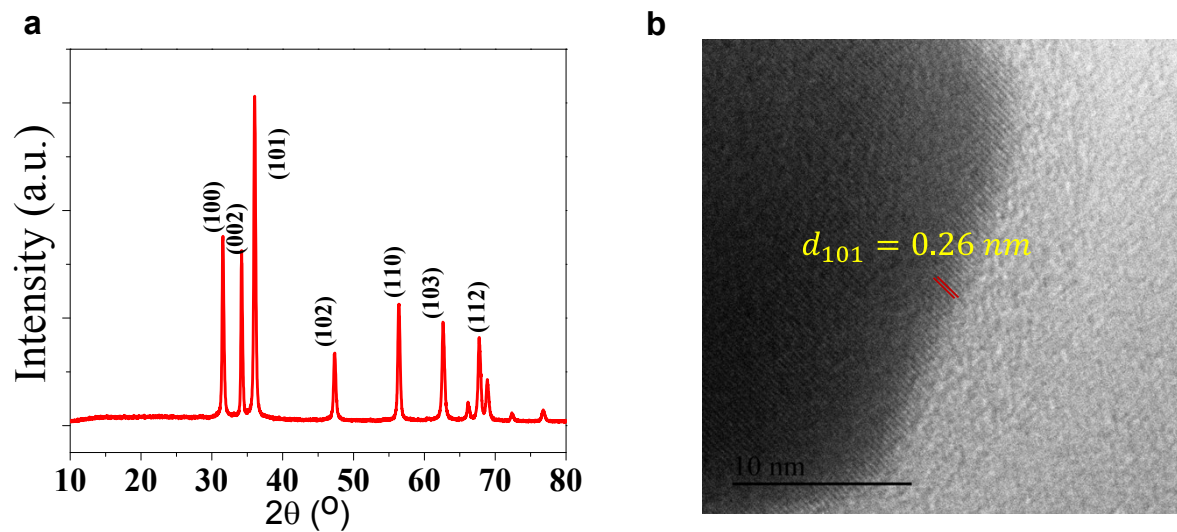

**Fig. S1** (a) XRD pattern of the ZnO nanorod powder. (b) HR-TEM image (scale bar~ 10 nm) of a single ZnO nanorod with marked d-spacing of 0.26 nm.

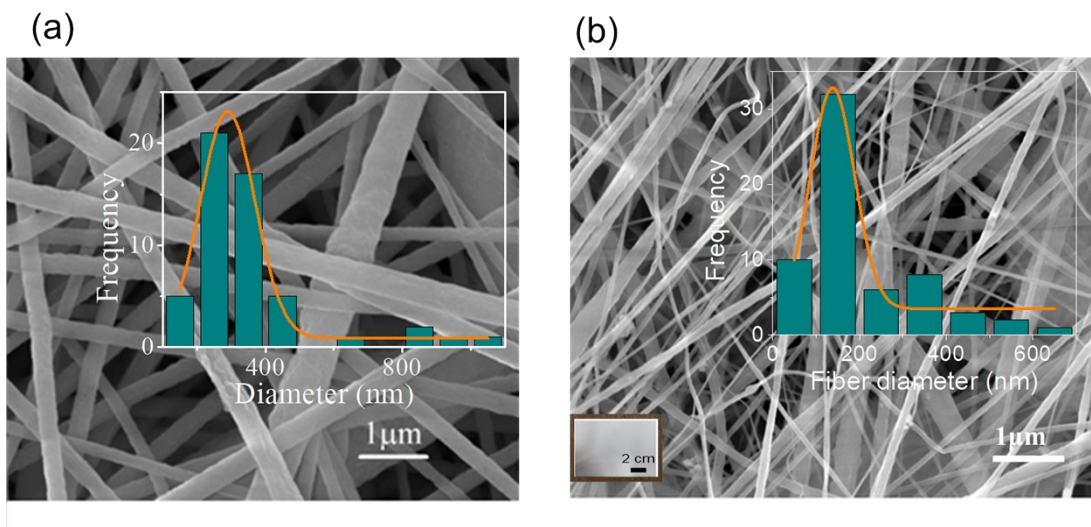

**Fig. S2** FE-SEM images of electrospun nanofibers mat of (a) neat PVDF and (b) PVDF-ZnO composite nanofibers with histogram plot (Gaussian fit) of nanofiber diameter distribution in the inset.

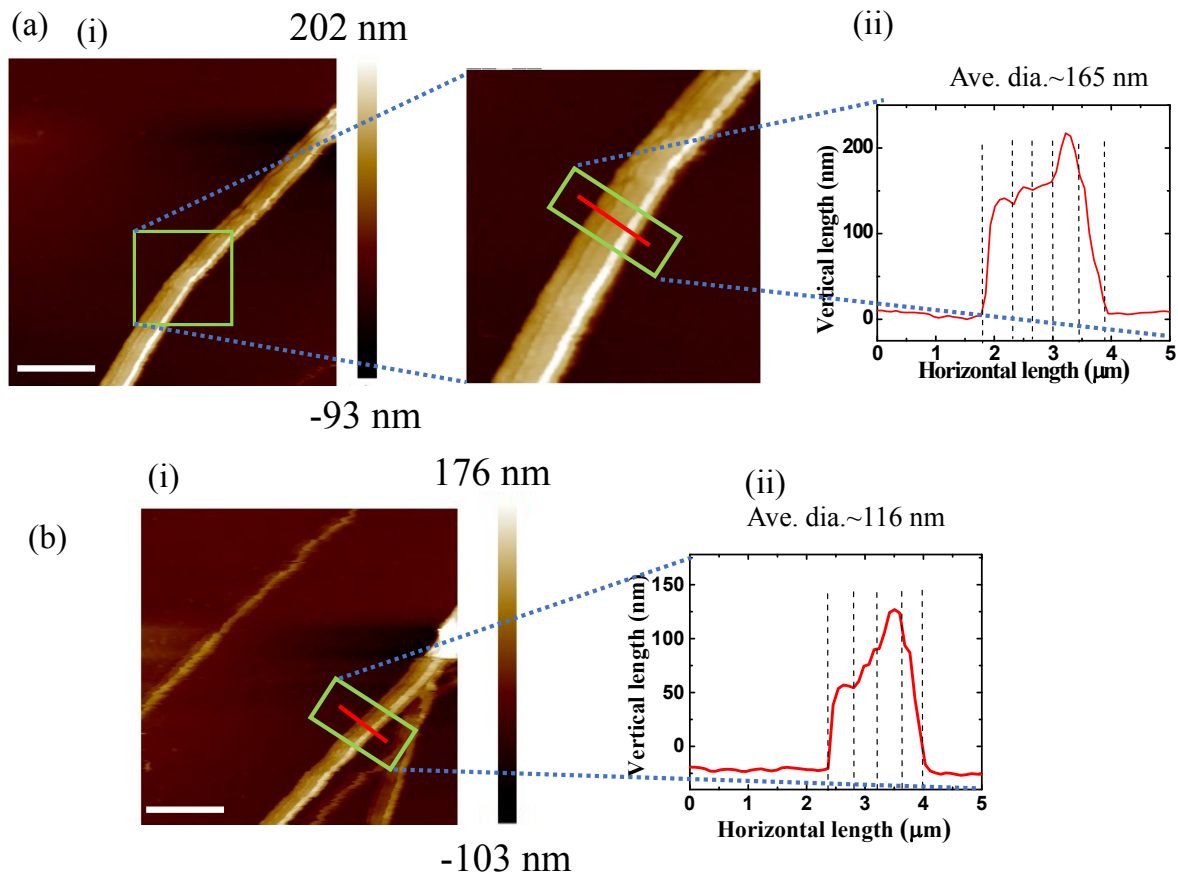

Fig. S3 (a) (i) Topography image (scan area:  $20\ \mu\text{m} \times 20\ \mu\text{m}$ ) and the corresponding enlarged view of the nanofiber used in the PFM study and (ii) line profile of the nanofiber (marked in blue colour line) showing the height difference between the substrate and the fiber at several places are less than 200 nm. The dotted lines are indicating the fibers are placed side-wise and thus also indicating the average fiber diameter is  $\sim 165\ \text{nm}$  (b) (i) Topography image (scan area:  $20\ \mu\text{m} \times 20\ \mu\text{m}$ ) of another nanofiber on the substrate and (ii) height profile of the line scan on the blue colour region again showing fiber diameter less than 200 nm and average diameter is  $\sim 116\ \text{nm}$ . (All the scale bars:  $5\ \mu\text{m}$ ).

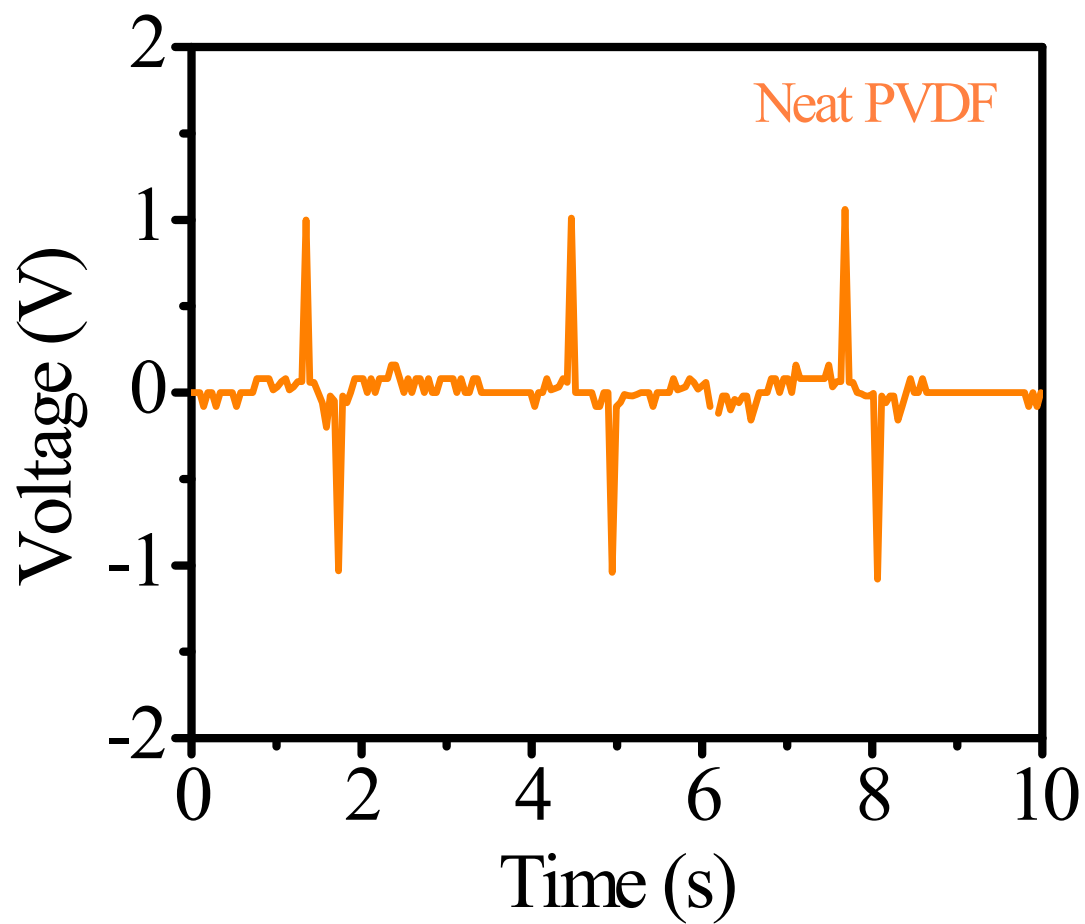

**Fig. S4** Output open circuit voltage ( $V_{oc}$ ) of neat PVDF nanofiber based all-fiber nanogenerator under 18 kPa of pressure amplitude.

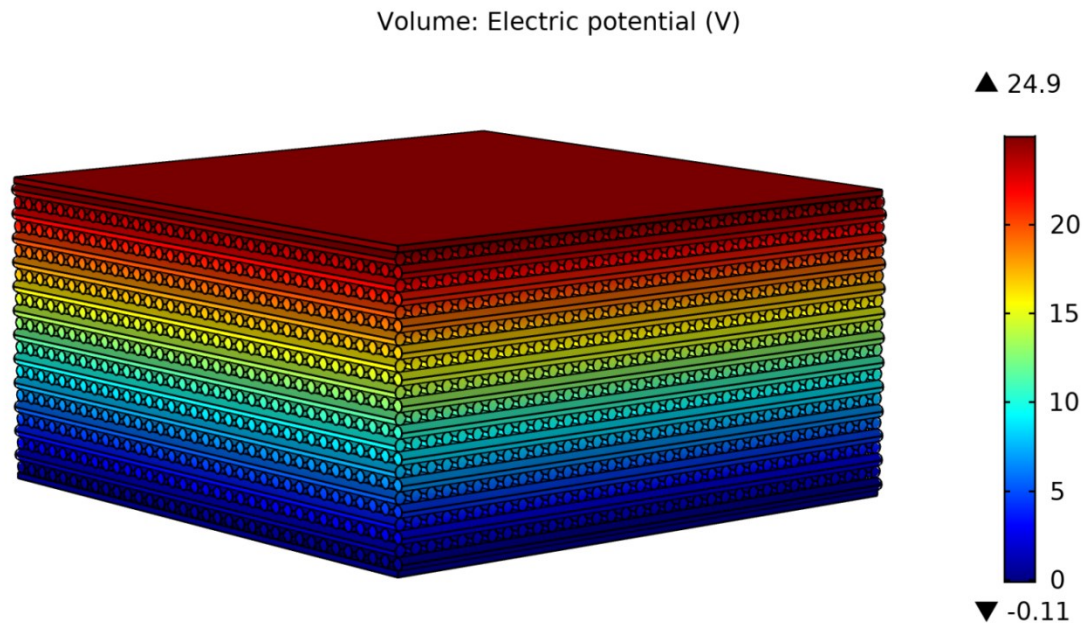

Fig. S5. Theoretically simulated output voltage under the pressure of 18 kPa using COMSOL multiphysics software. Details of the simulation is provided in ref. 29.

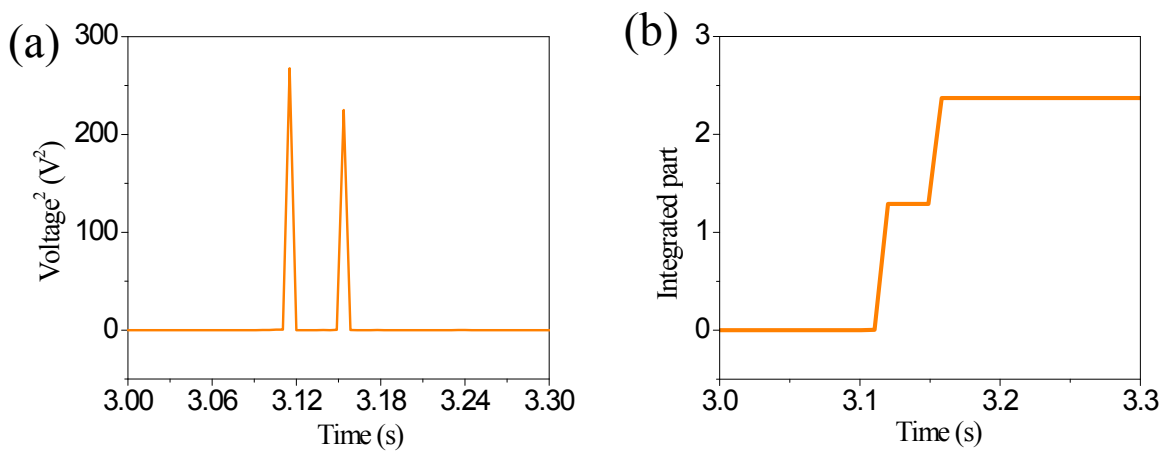

Fig. S6 (a) The square of the measured rectified output voltage at an external load of 10 M $\Omega$  for the integration to obtain the instantaneous electric power output. (b) The integration part of the time dependent  $V_{oc}$ .



**Table S1** Mechano-sensitivity of reported piezoelectric based pressure sensors.

| <b>Material</b>                                                                     | <b>Sensitivity</b><br><b>(V/kPa)</b> | <b>Reference</b> |
|-------------------------------------------------------------------------------------|--------------------------------------|------------------|
| Piezoelectric fiber array                                                           | 0.027                                | 1                |
| vertically integrated P(VDF-TrFE)                                                   |                                      |                  |
| P(VDF-TrFE)/CMOS transistor                                                         | 0.011                                | 2                |
| P(VDF-TrFE) film                                                                    | $2.2 \times 10^{-5}$                 | 3                |
| Carbonized electrospun polyacrylonitrile/barium titanate (PAN-C/BTO) nanofiber film | 0.324                                | 4                |
| Aligned P(VDF-TrFE)/MWCNT composites                                                | 0.121                                | 5                |
| Cellular fluorocarbon                                                               | 1.54                                 | 6                |
| P(VDF-TrFE) thin film                                                               | $7.5 \times 10^{-4}$                 | 7                |
| Eletrospun PVDF fabric                                                              | $8.2 \times 10^{-4}$                 | 8                |
| P(VDF-TrFE) nanotube                                                                | 0.05                                 | 9                |
| Electrospun                                                                         | 0.017                                | 10               |

|                                                                  |            |                  |
|------------------------------------------------------------------|------------|------------------|
| PVDF/BaTiO <sub>3</sub><br>nanowire (NW)<br>nanocomposite fibers |            |                  |
| Laterally aligned PZT angle-<br>crystal nanowires                | 0.14       | 11               |
| PVDF-MWCNT-<br>OMMT                                              | 0.0176     | 12               |
| PVDF-ZnO nanofibers                                              | 0.00312    | 13               |
| <i>PVDF-ZnO NPs nanofibers</i>                                   | <i>1.0</i> | <i>This work</i> |

**Table S2** A piezoelectric nanogenerator related data for comparison of device active materials, electrode materials, output performance. (‡NM: Not Mentioned).

| <b>Electrospun fiber</b>                              | <b>Electrode</b>                                                                  | <b>Voltage/Current</b> | <b>Power</b>             | <b>Ref.</b> |
|-------------------------------------------------------|-----------------------------------------------------------------------------------|------------------------|--------------------------|-------------|
| PVDF                                                  | Cu foil                                                                           | 76 mV and 39 nA        | 577.6 pW/cm <sup>2</sup> | 14          |
| PVDF/NaNbO <sub>3</sub>                               | Ag coated fabric                                                                  | 3.4 V, 4.4 μA          | ‡NM                      | 15          |
| ZnO/PVDF                                              | Ag conductive fabric                                                              | 8.36 V, 0.17 μA        | 77.69 nWcm <sup>-2</sup> | 16          |
| PVDF/CH <sub>3</sub> NH <sub>3</sub> PbI <sub>3</sub> | Ni- Cu coated fabrics                                                             | 2 V/50 nA              | 0.8 mW/m <sup>2</sup>    | 17          |
| PVDF                                                  | PEDOT                                                                             | 1 V, 0.15 mA           | 52 μWcm <sup>-3</sup>    | 18          |
| BaTiO <sub>3</sub> /PZT/CNT/PVDF                      | carbon filled polyethylene                                                        | 6V/ 4 nA               | NM                       | 19          |
| PVDF-TrFE                                             | conductive thread                                                                 | 16.2 mV                | NM                       | 20          |
| PVDF                                                  | conductive nanofiber membrane (PVP, PEDOT:PSS, ethyl alcohol, ethylene glycol and | 8 V/3.76 μA            | NM                       | 21          |

| ionic liquid)                      |                                                  |                         |                                                  |                  |
|------------------------------------|--------------------------------------------------|-------------------------|--------------------------------------------------|------------------|
| PVDF-MoS <sub>2</sub>              |                                                  | 12 V, 12nA              | 0.01 $\mu\text{W}/\text{cm}^2$                   | 22               |
| Random PVDF                        | Al foil                                          | 2.21 V/ 4 $\mu\text{A}$ | 0.16 $\text{mW}/\text{cm}^3$                     | 23               |
| PVDF/graphene oxide                | Cu–Ni plated<br>fine knit<br>polyester<br>fabric | 7 V                     | 0.62 $\mu\text{W}/\text{cm}^2$                   | 24               |
| PVDF-ZnO nonorods                  | Copper foil                                      | 85 V/2.2 $\mu\text{A}$  | NM                                               | 25               |
| <i>PVDF-ZnO NPs<br/>nanofibers</i> | <i>Ni- Cu coated<br/>fabrics</i>                 | <i>18 V</i>             | <i>26.7 <math>\mu\text{W}/\text{cm}^2</math></i> | <i>This work</i> |

**Table S3** A piezoelectric nanogenerator related data for comparison of previously reported PVDF/ZnO composites. (¥NM: Not Mentioned).

| Material                              | $d_{33}$        | Voltage/Current  | Power                     | References                                                                                                              |
|---------------------------------------|-----------------|------------------|---------------------------|-------------------------------------------------------------------------------------------------------------------------|
| PVDF-ZnO nanorod                      | ¥NM             | 8.36V/139.36nA   | 77.69 nW/cm <sup>2</sup>  | Polymers 2018, 10, 745                                                                                                  |
| PVDF-ZnO nanorod                      | NM              | ~356mV/456 nA    | NM                        | RSC Adv., 2019, 9, 10117–10123                                                                                          |
| Cowpea-structured PVDF/ZnO nanofibers | NM              | ~10 V/500 nA     | NM                        | Nano Energy, 55, 2019, 516-525                                                                                          |
| PVDF-ZnO nanorods                     | NM              | 1.12 V/ 1.6 l µA | 0.2 l µW cm <sup>-2</sup> | J Mater Sci 54, 2754–2762 (2019)                                                                                        |
| PVDF-ZnO nanowires                    | NM              | 2.5 V/0,1 µA     | NM                        | Phys. Chem. Chem. Phys., 2014, 16, 5475—5479                                                                            |
| PVDF-ZnO nanowires                    | NM              | 480 mV           | NM                        | Mater. Res. Express 5 (2018) 035057                                                                                     |
| PVDF-ZnO nanorods                     | 14.91±4.39 pm/V | NM               | NM                        | 2018 IEEE 18th International Conference on Nanotechnology (IEEE-NANO), Materials Science, DOI:10.1109/NANO.2018.8626362 |
| PVDF-ZnO                              | -1.17           | 1.81 V/0.57µA    | 0.21 µW/cm <sup>2</sup>   | Polym Adv Technol. 2017;1–8.                                                                                            |

|                     |                 |                     |                                               |                                   |                            |
|---------------------|-----------------|---------------------|-----------------------------------------------|-----------------------------------|----------------------------|
| nanorods            | pC/N            |                     |                                               |                                   |                            |
| PVDF-ZnO<br>NWs     | NM              | 2.4 V/152.2 $\mu$ A | NM                                            | Nanomater                         | Nanotechnol, 2014,<br>4:24 |
| PVDF-<br>BaTiO3_ZnO | NM              | 12 V                | NM                                            | Polymer Testing, 79, 2019, 106001 |                            |
| <i>PVDF-ZnO</i>     | <i>-32 pm/V</i> | <i>18 V</i>         | <i>26.7 <math>\mu</math>W.cm<sup>-2</sup></i> | <i>This work</i>                  |                            |
| <i>NPs</i>          |                 |                     |                                               |                                   |                            |
| <i>composites</i>   |                 |                     |                                               |                                   |                            |
| <i>nanofibers</i>   |                 |                     |                                               |                                   |                            |

**Table S4** A summary or comparison of device materials, electrode materials, and capacitor charging performances of the A-PNG with the reported nanogenerators.

| <b>Active material</b>                | <b>Electrode</b>       | <b>Charging time(s), Capacitor value (<math>\mu\text{F}</math>)</b> | <b>Saturation voltage (V), Power stored (<math>\mu\text{W}</math>)</b> | <b>References</b> |
|---------------------------------------|------------------------|---------------------------------------------------------------------|------------------------------------------------------------------------|-------------------|
| P(VDF-TrFE)/BaTiO <sub>3</sub>        | conductive fabric      | 250, 0.068                                                          | 35, 0.17                                                               | 26                |
| aligned PVDF NFs                      | (PANI-PVDF) NFs mats   | 60, 1.0                                                             | 4, 1.3                                                                 | 27                |
| P(VDF-TrFE)                           | Al foils               | 1800, 47                                                            | 16, 3.34                                                               | 28                |
| Pt-PVDF                               | Cu–Ni polyester fabric | 80, 1                                                               | 3, 0.06                                                                | 29                |
| PZT-NH <sub>2</sub> NPs               | Al-coated (PI)/PET     | 100, 2.2                                                            | 4, 0.18                                                                | 30                |
| Hybridization sugar-encapsulated PVDF | Conducting textile     | 100, 1                                                              | 8, 0.32                                                                | 31                |
| PVDF/ BaTiO <sub>3</sub>              | Al foils               | 76, 1                                                               | 1.40, 0.01                                                             | 32                |
| (P(VDF-TrFE))/ BaTiO <sub>3</sub>     | ITO-coated PET         | 120, 4.7                                                            | 1.5, 0.04                                                              | 33                |
| Poly(vinyl alcohol)                   | Ni–Cu                  | 40, 1                                                               | 0.72, 0.007                                                            | 34                |

---

|                    |                  |          |  |            |           |
|--------------------|------------------|----------|--|------------|-----------|
| (PVA)/ ZnS         | polyester        |          |  |            |           |
| nanorods           | fabric,          |          |  |            |           |
| PVDF/ ZnS          | Ni–Cu            | 130, 2.2 |  | 10, 0.85   | 35        |
| nanorods           | polyester        |          |  |            |           |
|                    | fabric           |          |  |            |           |
| PVDF-niobate-      | AgNW             | 300, 2.2 |  | 5, 0.09    | 36        |
| based              |                  |          |  |            |           |
| [P(VDF-TrFE)]      | 3D PMMA/Au       | 5, 0.1   |  | 3.2, 0.01  | 37        |
| Ce <sup>3+</sup> / | Ni-Cu plated     | 60, 4.7  |  | 0.75, 0.02 | 38        |
| PVDF/Graphene      | polyester        |          |  |            |           |
|                    | fabric           |          |  |            |           |
| PVDF-ZnO           | <i>NPs</i> Ni–Cu | 65, 2.2  |  | 4.7, 0.37  | This work |
| <i>nanofibers</i>  | polyester        |          |  |            |           |
|                    | fabric           |          |  |            |           |

---



## References

1. X. L. Chen, H. M. Tian, X. M. Li, J. Y. Shao, Y. C. Ding, N. L. An and Y. P. Zhou, *Nanoscale*, 2015, **7**, 11536.
2. R. S. Dahiya, D. Cattin, A. Adami, C. Collini, L. Barboni, M. Valle, L. Lorenzelli, R. Oboe, G. Metta and F. Brunetti, *IEEE Sensors J*, 2011, **11**, 3216.
3. C. Li, P. –M. Wu, S. Lee, A. Gorton, M. J. Schulz and C. H. Ahn, *J. Microelectromech. Syst.*, 2008, **17**, 334.
4. G. Zhao, X. Zhang, X. Cui, S. Wang, Z. Liu, L. Deng, A. Qi, X. Qiao, L. Li, C. Pan, Y. Zhang and L. Li, *ACS Appl. Mater. Interfaces*, 2018, **10**, 15855.
5. A. Wang, M. Hu, L. Zhou and X. Qiang, *Nanomaterials*, 2018, **8**, 1021.
6. B. Wang, C. Liu, Y. Xiao, J. Zhong, W. Li, Y. Cheng, B. Hu, L. Huang and J. Zhou, *Nano Energy*, 2017, **32**, 42.
7. T. Sharma, S. –S. Je, B. Gill and J. X. J. Zhang, *Sens. Actuators A: Physical*, 2012, **177**, 87.
8. Y. R. Wang, J. M. Zheng, G. Y. Ren, P. H. Zhang, and C. Xu, *Smart Mater. Struct.*, 2011, **20**, 045009.
9. V. Bhavanasi, D. Y. Kusuma and P. S. Lee, *Adv. Energy Mater.* 2014, **4**, 1400723.
10. W. Guo, C. Tan, K. Shi, J. Li, X. –X. Wang, B. Sun, X. Huang, Y. –Z. Long and P. Jiang, *Nanoscale*, 2018, **10**, 17751.
11. Q. –L. Zhao, G. –P. He, J. –J. Di, W. –L. Song, Z. –L. Hou, P. –P. Tan, D. –W. Wang and M. –S. Cao, *ACS Appl. Mater. Interfaces*, 2017, **9**, 24696.
12. S. M. Hosseini and A. A. Yousefi, *Org. Electron.*, 2017, **50**, 121.
13. T. Yang, H. Pan, G. Tian, B. Zhang, D. Xiong, Y. Gao, C. Yan, X. Chu, N. Chen, S. Zhong, L. Zhang, W. Deng and W. Yang, *Nano Energy*, 2020, **72**, 104706.

14. Z. Liu, C. Pan, L. Lin, J. Huang and Z. Ou, *Smart Mater. Struct.*, 2014, **23**, 025003.
15. W. Zeng, X. M. Tao, S. Chen, S. M. Shang, H. L. W. Chan and S. H. Choy, *Energy Environ. Sci.*, 2013, **6**, 2631.
16. M. Kim, Y. S. Wu, E. C. Kan and J. Fan, *Polymers*, 2018, **10**, 745.
17. A. Sultana, S. K. Ghosh, M. M. Alam, P. Sadhukhan, K. Roy, M. Xie, C. R. Bowen, S. Sarkar, S. Das, T. R. Middy and D. Mandal, *ACS Appl. Mater. Interfaces*, 2019, **11**, 27279.
18. Y. Zhou, J. He, H. Wang, K. Qi, N. Nan, X. You, W. Shao, L. Wang, B. Ding and S. Cui, *Sci. Rep.*, 2017, **7**, 12949.
19. X. Lu, H. Qu and M. Skorobogatiy, *ACS Nano*, 2017, **11**, 2103.
20. E. Yang, Z. Xu, L. K. Chur, A. Behroozfar, M. Baniasadi, S. Moreno, J. Huang, J. Gilligan and M. Minary-Jolandan, *ACS Appl. Mater. Interfaces*, 2017, **9**, 24220.
21. M. -H. You, X. -X. Wang, X. Yan, J. Zhang, W.-Z. Song, M. Yu, Z. -Y. Fan, S. Ramakrishna and Y. -Z. Long, *J. Mater. Chem. A*, 2018, **6**, 3500.
22. K. Maity, B. Mahanty, T. K. Sinha, S. Garain, A. Biswas, S. K. Ghosh, S. Manna, S. K. Ray and D. Mandal, *Energy Technology*, 2017, **5**, 234.
23. J. Fang, X. Wang and T. Lin, *J. Mater. Chem.*, 2011, **21**, 11088.
24. K. Roy, S. K. Ghosh, A. Sultana, S. Garain, M. Xie, C. R. Bowen, K. Henkel, D. Schmeißer and D. Mandal, *ACS Appl. Nano Mater.*, 2019, **2**, 2013.
25. J. Li, S. Chen, W. Liu, R. Fu, S. Tu, Y. Zhao, L. Dong, B. Yan and Y. Gu, *J. Phys. Chem. C*, 2019, **123**, 11378–11387.
26. X. Guan, B. Xu and J. Gong, *Nano Energy*, 2020, **70**, 104516.
27. K. Maity, S. Garain, K. Henkel, D. Schmeißer and D. Mandal, *ACS Appl. Polym. Mater.*, 2020, **2**, 862.

28. M. M. Abolhasani, M. Naebe, K. Shirvanimoghaddam, H. Fashandi, H. Khayyam, M. Joordens, A. Pipertzis, S. Anwar, R. Berger, G. Floudas, J. Michels and K. Asadi, *Nano Energy*, 2019, **62**, 594.
29. S. K. Ghosh and D. Mandal, *Nano Energy*, 2018, **53**, 245.
30. E. J. Lee, T. Y. Kim, S. –W. Kim, S. Jeong, Y. Choi and S. Y. Lee, *Energy Environ. Sci.*, 2018, **11**, 1425.
31. K. Maity, S. Garain, K. Henkel, D. Schmeißer and D. Mandal, *ACS Appl. Mater. Interfaces*, 2018, **10**, 44018.
32. K. Shi, B. Sun, X. Huang and P. Jiang, *Nano Energy*, 2018, **52**, 153.
33. S. Siddiqui, D. –I. Kim, E. Roh, L. T. Duy, T. Q. Trung, M. T. Nguyen and N. –E. Lee, *Nano Energy*, 2016, **30**, 434.
34. A. Sultana, M. M. Alam, A. Biswas, T. R. Middy and D. Mandal, *Transl. Mater. Res.* 3(2016), 045001.
35. A. Sultana, M. M. Alam, S. K. Ghosh, T. R. Middy and D. Mandal, *Energy*, 2019, **166**, 963.
36. C. Zhang, Y. Fan, H. Li, Y. Li, L. Zhang, S. Cao, S. Kuang, Y. Zhao, A. Chen, G. Zhu and Z. L. Wang, *ACS Nano*, 2018, **12**, 4803.
37. L. Zhang, J. Gui, Z. Wu, R. Li, Y. Wang, Z. Gong, X. Zhao, C. Sun and S. Guo, *Nano Energy*, 2019, **65**, 103924.
38. C. Brosseau, P. Queffelec and P. Talbot, *J. Appl. Phys.*, 2001, **89**, 4532.
